# Supplementary material for: Overcoming hypoxia-induced functional suppression of NK cells
Source: PubMed Central journal article supplement — J Immunother Cancer. 2020 Apr 28;8(1):e000246. doi: 10.1136/jitc-2019-000246 (PMC7213912; doi:10.1136/jitc-2019-000246), 2020-04-28
Supplement: jitc-2019-000246supp001.pdf [file jitc-2019-000246supp001.pdf]

**Supplemental Material**  
**Overcoming hypoxia-induced functional suppression of NK cells**  
**Solocinski et al.**

**Table S1. Antibodies used for Table 1 Flow**

|                                                                                    |
|------------------------------------------------------------------------------------|
| PE Mouse Anti-Human HLA-ABC, BD Pharmingen (catalog #555553)                       |
| PE Mouse Anti-Human MIC A/B, BD Pharmingen (catalog #558352)                       |
| PE Mouse Anti-Human B7H6, Clone # 875001, R&D Systems (catalog #FAB7144P-025)      |
| PE Mouse Anti-Human CD112, BD Pharmingen (catalog #551057)                         |
| PE Mouse Anti-Human CD155, Biolegend, clone TX24 (catalog #337507)                 |
| PE Mouse Anti-Human PDL1 (CD274), clone MIH1 (catalog #557924)                     |
| PE Mouse Anti-Human EGFR, BD Pharmingen (catalog #555997)                          |
| PE Mouse Anti-Human NKG2D (CD314), clone 1D11, BD Pharmingen (catalog #557940)     |
| PE Mouse Anti-Human CD16, clone B73.1 eBioscience (catalog #12-0167-42)            |
| PE Mouse Anti-Human NKp44, clone p44-8, BD Pharmingen (catalog #558563)            |
| PE Mouse Anti-Human NKp46 (CD335), BD Pharmingen (catalog #557991)                 |
| PE Mouse Anti-Human DNAM1 (CD 226), BD Pharmingen (catalog #559789)                |
| PE Mouse Anti-Human Granzyme, clone GB11, BD Pharmingen (catalog #561142)          |
| PE Mouse Anti-human Perforin, BD Pharmingen (catalog #556437)                      |
| Human Fc block, BD Pharmingen (catalog #564219)                                    |
| Colivelin (Catalog #3945, TOCRIS/R&D Systems) used at 100uM concentration          |
| PE Mouse Anti-human pSTAT3 (pS727), clone 49/p-Stat3; BD Phosflow, catalog #558557 |
| PE Mouse Anti-human STAT3, clone M59-50, BD Phosflow, catalog #560391              |
| Phosflow Perm Buffer III (BD) used according to manufacturer's instructions        |
