# Supplementary material for: Overcoming hypoxia-induced functional suppression of NK cells
Source: PubMed Central journal article supplement — J Immunother Cancer. 2020 Apr 28;8(1):e000246. doi: 10.1136/jitc-2019-000246 (PMC7213912; doi:10.1136/jitc-2019-000246), 2020-04-28
Supplement: jitc-2019-000246supp002.pdf [file jitc-2019-000246supp002.pdf]

Supplemental Figure 1.

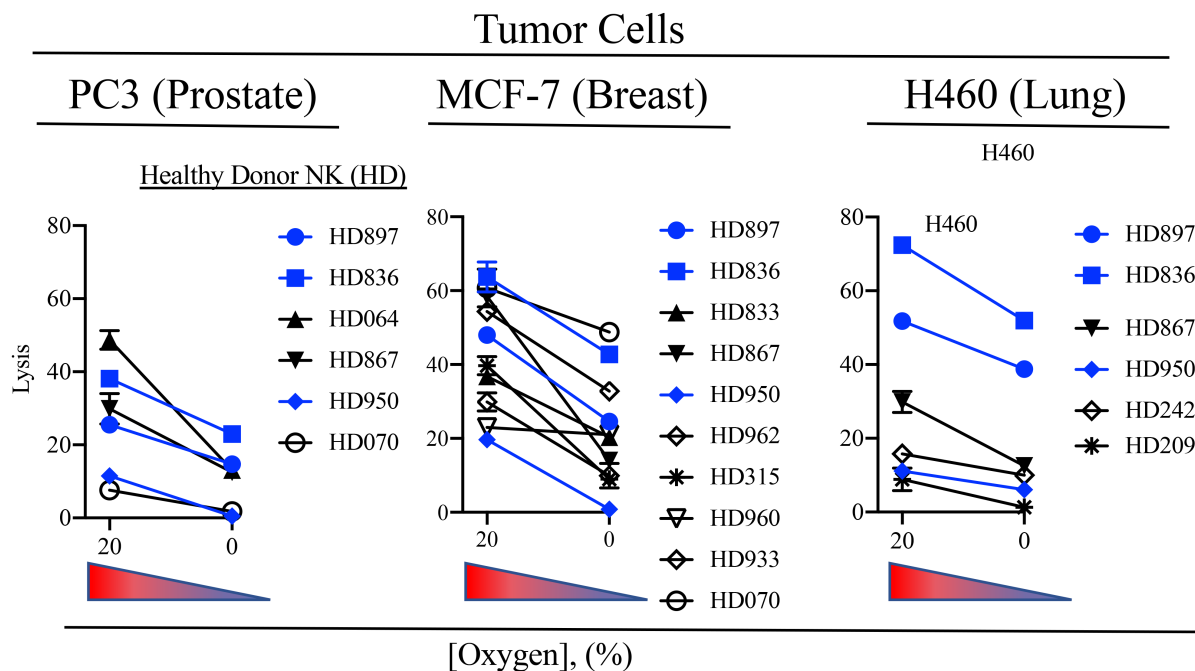

**Supplemental Figure S1.** Susceptibility of healthy donor NK cells to hypoxia induced functional suppression. Acute hypoxia inhibits killing by healthy donor (HD) NK cells. Prostate (PC3), breast (MCF-7) and lung (H460) cancer cell lines were labeled with  $^{111}\text{In}$  and co-incubated with depicted healthy donor NK cells in 20% or 0% oxygen for 5 h at 37°C.  $^{111}\text{In}$  release was measured and used to calculate percent lysis of target cells.
